# Supplementary material for: The acute phase serum zinc concentration is a reliable biomarker for predicting the functional outcome after spinal cord injury
Source: PubMed Central journal article supplement — eBioMedicine. 2019 Mar 20;41:659–69. doi: 10.1016/j.ebiom.2019.03.003 (PMC6444130; doi:10.1016/j.ebiom.2019.03.003), 2019-03-20

**Supplementary Fig.1**

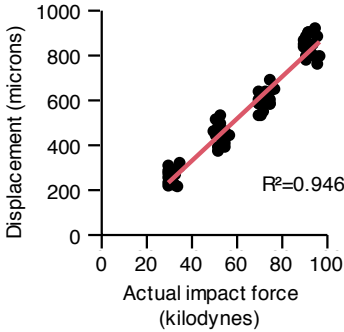

# Supplementary Fig.2a, b

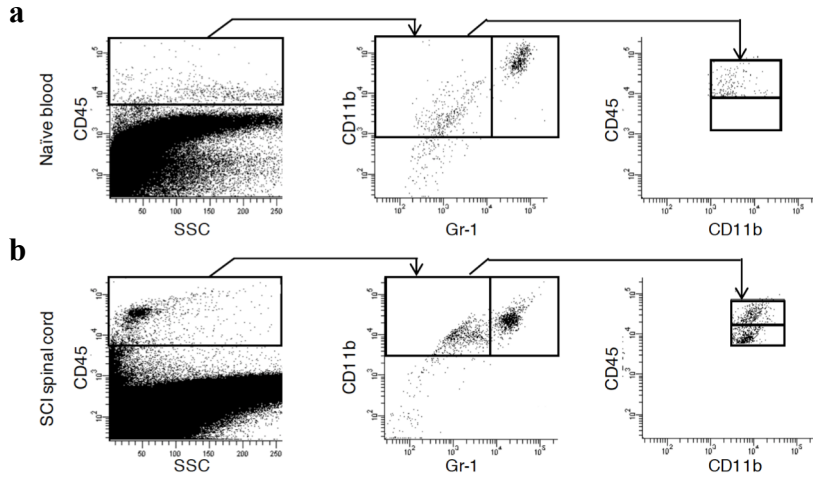

# Supplementary Fig.3a, b

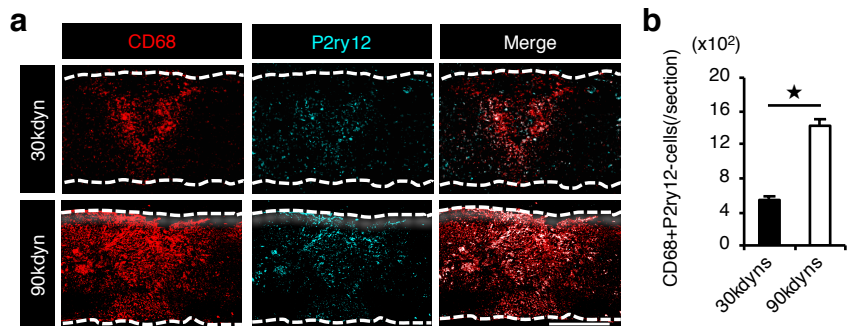

# Supplementary Fig.4a, b

**a**

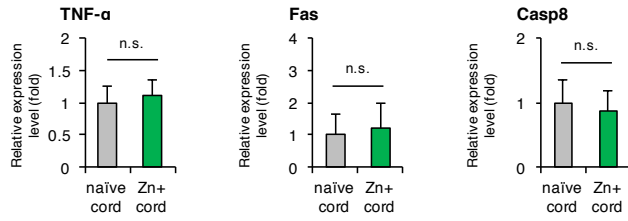

**b**

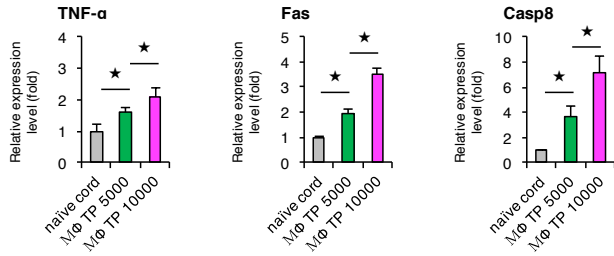

Supplementary Fig.5

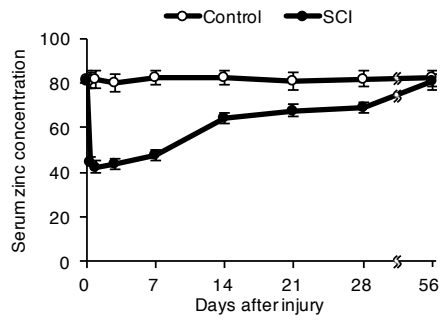

Supplement: mmc2.pdf [file mmc2.pdf]
